# Supplementary material
Source: ML conference proceedings conference paper supplement (https://openaccess.thecvf.com/content/WACV2024/html/Ranem_Continual_Atlas-Based_Segmentation_WACV_2024_paper.html)
Supplement: Supplementary file 1 [file Ranem_Continual_Atlas-Based_Segmentation_WACV_2024_supplemental.pdf]

# Supplementary Material – Continual atlas-based segmentation of prostate MRI

Amin Ranem<sup>1</sup>      Camila González<sup>2</sup>      Daniel Pinto dos Santos<sup>3</sup>      Andreas M. Bucher<sup>4</sup>  
 Ahmed E. Othman<sup>5</sup>      Anirban Mukhopadhyay<sup>1</sup>

<sup>1</sup> Technical University of Darmstadt, <sup>2</sup> Stanford University, <sup>3</sup> University of Cologne,  
<sup>4</sup> University of Frankfurt, <sup>5</sup> University Medical Center Mainz  
 amin.ranem@gris.tu-darmstadt.de

## 1. End-to-end vs. atlas-based segmentation

Table 1 provides the Dice scores with standard deviation for every trained baseline evaluated across all tasks which were used to create Figure 9 from the main manuscript.

| Baselines    |                 | Dice $\uparrow \pm \sigma \downarrow$ [%] |                                    |                                    |                                     |                                    |                                     |                                    |
|--------------|-----------------|-------------------------------------------|------------------------------------|------------------------------------|-------------------------------------|------------------------------------|-------------------------------------|------------------------------------|
|              |                 | $\mathcal{T}_1$                           | $\mathcal{T}_2$                    | $\mathcal{T}_3$                    | $\mathcal{T}_4$                     | $\mathcal{T}_5$                    | $\mathcal{T}_6$                     | $\mathcal{T}_7$                    |
| U-Net        | $\mathcal{T}_1$ | <b>75.38 <math>\pm</math> 5.96</b>        | 37.82 $\pm$ 15.47                  | 17.04 $\pm$ 4.83                   | 42.02 $\pm$ 23.75                   | 6.66 $\pm$ 6.86                    | 50.86 $\pm$ 1.78                    | 76.14 $\pm$ 5.66                   |
|              | $\mathcal{T}_2$ | 36.36 $\pm$ 19.55                         | <b>70.25 <math>\pm</math> 6.30</b> | 25.81 $\pm$ 9.26                   | 52.21 $\pm$ 15.53                   | 50.30 $\pm$ 8.01                   | 36.78 $\pm$ 7.98                    | 37.01 $\pm$ 10.70                  |
|              | $\mathcal{T}_3$ | 21.12 $\pm$ 17.64                         | 53.55 $\pm$ 6.23                   | <b>78.50 <math>\pm</math> 5.04</b> | 55.44 $\pm$ 2.65                    | 37.54 $\pm$ 6.98                   | 50.12 $\pm$ 5.39                    | 18.94 $\pm$ 9.90                   |
|              | $\mathcal{T}_4$ | 46.48 $\pm$ 17.13                         | 65.69 $\pm$ 6.29                   | 60.23 $\pm$ 2.08                   | <b>66.44 <math>\pm</math> 11.89</b> | 49.19 $\pm$ 13.37                  | 65.73 $\pm$ 10.23                   | 44.92 $\pm$ 11.52                  |
|              | $\mathcal{T}_5$ | 9.61 $\pm$ 7.19                           | 48.44 $\pm$ 8.02                   | 29.82 $\pm$ 5.24                   | 40.26 $\pm$ 18.72                   | <b>59.55 <math>\pm</math> 4.97</b> | 38.21 $\pm$ 4.85                    | 7.87 $\pm$ 7.35                    |
|              | $\mathcal{T}_6$ | 22.05 $\pm$ 19.25                         | 54.02 $\pm$ 10.05                  | 58.41 $\pm$ 4.21                   | 59.37 $\pm$ 4.41                    | 52.10 $\pm$ 1.99                   | <b>77.42 <math>\pm</math> 3.27</b>  | 22.13 $\pm$ 17.11                  |
|              | $\mathcal{T}_7$ | 73.52 $\pm$ 7.57                          | 37.38 $\pm$ 9.17                   | 20.28 $\pm$ 3.27                   | 32.83 $\pm$ 22.86                   | 10.75 $\pm$ 7.59                   | 45.11 $\pm$ 3.84                    | <b>76.12 <math>\pm</math> 3.83</b> |
| Atlas Replay | $\mathcal{T}_1$ | <b>70.50 <math>\pm</math> 4.63</b>        | 56.02 $\pm$ 4.78                   | 72.87 $\pm$ 6.30                   | 73.79 $\pm$ 1.55                    | 34.81 $\pm$ 22.70                  | 63.69 $\pm$ 9.80                    | 73.02 $\pm$ 3.63                   |
|              | $\mathcal{T}_2$ | 44.27 $\pm$ 18.47                         | <b>72.30 <math>\pm</math> 6.05</b> | 73.92 $\pm$ 3.50                   | 75.16 $\pm$ 0.91                    | 53.73 $\pm$ 13.33                  | 66.62 $\pm$ 7.50                    | 43.99 $\pm$ 9.74                   |
|              | $\mathcal{T}_3$ | 34.30 $\pm$ 7.69                          | 34.69 $\pm$ 6.41                   | <b>73.11 <math>\pm</math> 4.42</b> | 71.33 $\pm$ 2.28                    | 23.81 $\pm$ 11.07                  | 44.28 $\pm$ 8.05                    | 31.97 $\pm$ 7.77                   |
|              | $\mathcal{T}_4$ | 23.20 $\pm$ 9.93                          | 23.61 $\pm$ 7.13                   | 63.36 $\pm$ 7.56                   | <b>78.40 <math>\pm</math> 0.72</b>  | 20.57 $\pm$ 7.71                   | 37.11 $\pm$ 4.82                    | 19.55 $\pm$ 5.34                   |
|              | $\mathcal{T}_5$ | 32.79 $\pm$ 15.13                         | 53.30 $\pm$ 2.42                   | 72.87 $\pm$ 5.67                   | 74.55 $\pm$ 2.59                    | <b>60.31 <math>\pm</math> 3.02</b> | 58.50 $\pm$ 9.19                    | 30.31 $\pm$ 8.77                   |
|              | $\mathcal{T}_6$ | 34.66 $\pm$ 15.19                         | 44.05 $\pm$ 6.22                   | 68.91 $\pm$ 3.17                   | 71.48 $\pm$ 4.08                    | 39.16 $\pm$ 15.10                  | <b>64.97 <math>\pm</math> 13.40</b> | 33.47 $\pm$ 8.32                   |
|              | $\mathcal{T}_7$ | 69.02 $\pm$ 5.74                          | 53.63 $\pm$ 8.64                   | 74.94 $\pm$ 5.43                   | 73.69 $\pm$ 1.35                    | 36.15 $\pm$ 16.09                  | 59.41 $\pm$ 10.48                   | <b>67.73 <math>\pm</math> 5.20</b> |

Table 1. Results for all baseline networks trained on every task individually and evaluated across all tasks; Bold values indicate the performance of the baseline on the validation set of the task it has been trained on.
